# Supplementary material for: Ex vivo culture to evaluate dynamic changes in the tumor microenvironment following durvalumab treatment
Source: Research Square preprint supplement (doi:10.21203/rs.3.rs-7180379/v1), 2025-08-08
Supplement: Supplementary file 1 [file 31af11ccc8baa8c1397dd088.pdf]

## Supplementary Figure

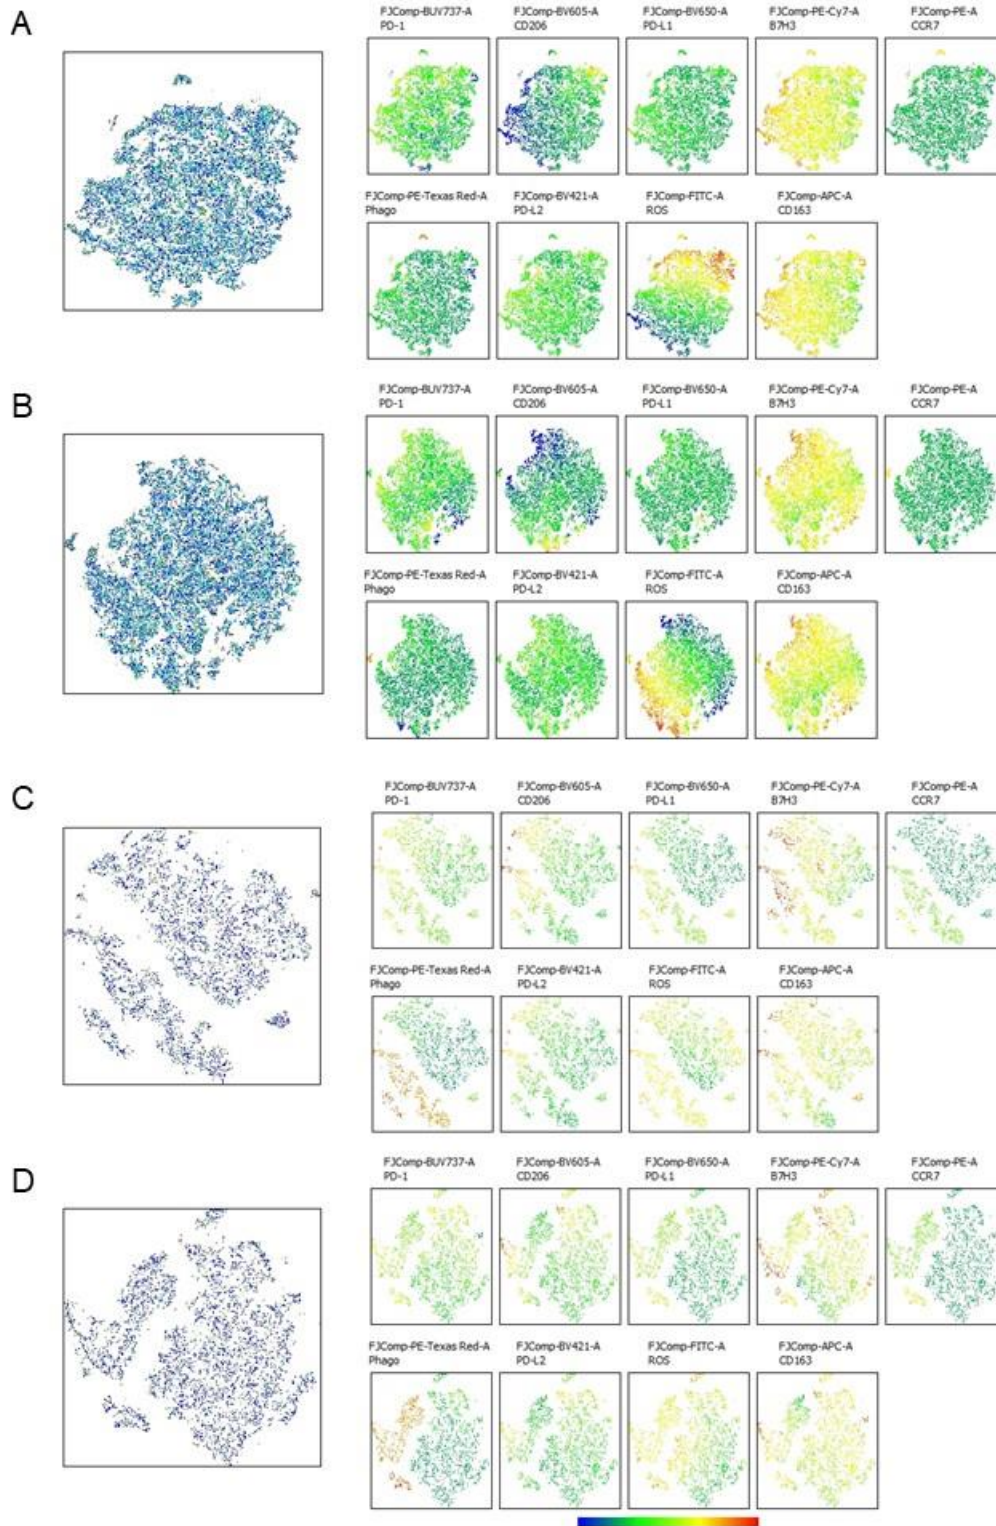

### Supplementary Figure 1: tSNE representation of macrophages

A. tSNE (t-distributed Stochastic Neighbor Embedding) representation of pooled BCa patients (n=35) treated with isotype control. B. tSNE representation of pooled BCa patients treated with durvalumab. C. tSNE representation of pooled PCa patients (n=35) treated with isotype control. D. tSNE representation of pooled PCa patients treated with durvalumab.

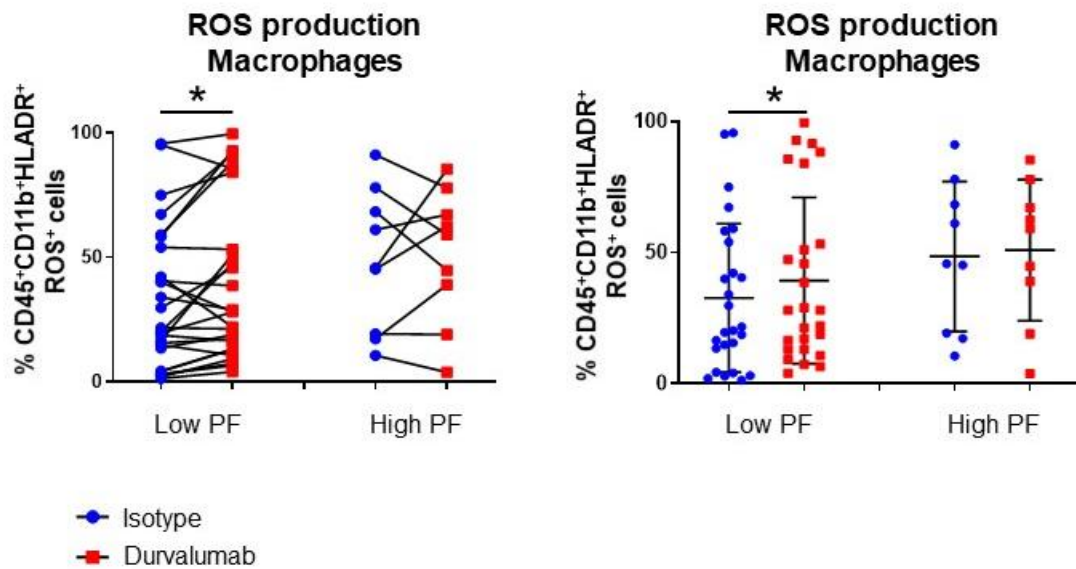

### Supplementary Figure 2: Link between level of periprostatic fat and ROS production by macrophages in PCa patients.

ROS production by macrophages (CD45<sup>+</sup>CD11b<sup>+</sup>HLADR<sup>+</sup>ROS<sup>+</sup> cells) is significantly increased by durvalumab treatment in patient with low periprostatic fat (\***p=00215**). ROS production by macrophages is unchanged after durvalumab treatment in patient with high periprostatic fat. Results are presented with individual patient changes (left) and overall group changes (right).

## Supplementary Tables

**Table S1:** Antibodies used for cell staining

| Antibody            | Fluorochrome | Catalogue number |
|---------------------|--------------|------------------|
| CD45                | BUV395       | 563792           |
| HLA-DR              | PercpCy505   | 552764           |
| CD11b               | APC-cy7      | 301342           |
| CD163               | AF647        | 333620           |
| B7H3 (CD276)        | PeCy7        | 351008           |
| CD206               | BV605        | 740417           |
| PD-L1 (CD274)       | BV650        | 563740           |
| PD-L2 (CD273)       | BV421        | 563842           |
| PD-1 (CD279)        | Buv737       | 612791           |
| Aqua Live Dead      | BV510        | L34957           |
| CCR7 (CD197)        | PE           | 552176           |
| dihydrorhodamine123 | FITC         | D632             |
| Phagocytosis Beads  | Pecf594      | L3030-1ML        |
